# Supplementary material for: Identification of compound drought and heatwave events on a daily scale and across four seasons
Source: Copernicus journal article supplement (doi:10.5194/egusphere-2023-147), 2023-06-08
Supplement: Supplementary file 1 [file egusphere-2023-147-supplement.pdf]

## **Supplementary Material - Daily identification of compound drought and heatwave across four seasons**

Baoying Shan<sup>1,2</sup>, Bernard De Baets<sup>1</sup>, Niko E.C. Verhoest<sup>2</sup>

<sup>1</sup>KERMIT, Department of Data Analysis and Mathematical Modelling, Ghent University, 9000 Ghent, Belgium.

<sup>2</sup>Hydro-Climatic Extremes Lab, Ghent University, 9000 Ghent, Belgium.

This supplementary material includes:

Table S1: The days per year and events number per year compared before after removing and merging

Table S2: Trend test of annual days for drought, heatwave, and CDHW events based on Mann Kendall statistic test for different cumulation periods and pre-identification thresholds.

Fig. S1: Mann Kendall statistic test at 0.05 level for daily mean temperature over 1901-2020 and 30-years moving window.

Fig. S2: Distribution of duration of droughts and heatwaves without removing and merging.

Fig. S3: Identification of drought, heatwave, and CDHW events (union, conditioned on drought, conditioned on heatwave, and intersection).

Table S1: The days per year and events number per year compared before after removing and merging

|          |        | Without removing and merging |                      |                        | After removing and merging |                      |                        |
|----------|--------|------------------------------|----------------------|------------------------|----------------------------|----------------------|------------------------|
| Drought  | Scales | SPI <sub>T</sub> =-0.5       | SPI <sub>T</sub> =-1 | SPI <sub>T</sub> =-1.5 | SPI <sub>T</sub> =-0.5     | SPI <sub>T</sub> =-1 | SPI <sub>T</sub> =-1.5 |
|          | 15     | 103.6, 11.0                  | 56.8, 7.8            | 38.4, 5.9              | 37.8, 1.12                 | 28.3, 1.13           | 21.2, 1.18             |
|          | 30     | 111.6, 7.2                   | 58.8, 5.2            | 36.9, 3.8              | 45.7, 0.65                 | 33.6, 0.68           | 17.9, 0.55             |
|          | 45     | 112.4, 6.1                   | 57.8, 4.0            | 36.4, 2.9              | 59.8, 0.78                 | 30.8, 0.60           | 18.7, 0.43             |
|          | 60     | 114.7, 5.0                   | 58.4, 3.3            | 35, 2.4                | 62.1, 0.58                 | 28.9, 0.43           | 24.9, 0.39             |
|          | 90     | 115.6, 3.8                   | 60.6, 2.9            | 36.3, 2.1              | 67.2, 0.43                 | 30.2, 0.25           | 23.6, 0.28             |
| Heatwave | Scales | SHI <sub>T</sub> =-0.5       | SHI <sub>T</sub> =1  | SHI <sub>T</sub> =1.5  | SHI <sub>T</sub> =-0.5     | SHI <sub>T</sub> =1  | SHI <sub>T</sub> =1.5  |
|          | 3      | 123.1, 21.9                  | 68.8, 16.4           | 42.9, 12.6             | 34.9, 1.83                 | 19.2, 1.56           | 16.4, 1.88             |
|          | 5      | 124.9, 16.5                  | 68.3, 12.0           | 42.8, 9.0              | 40.6, 1.73                 | 25.5, 1.83           | 16.4, 1.47             |
|          | 7      | 125.1, 13.6                  | 68.3, 9.8            | 43.4, 7.5              | 23.5, 0.49                 | 29.9, 1.90           | 16.5, 1.09             |
|          | 10     | 126, 11.1                    | 68.6, 7.8            | 44.5, 6.1              | 41.12, 1.23                | 33.6, 1.76           | 18.6, 1.08             |
|          | 15     | 127.6, 8.5                   | 69.6, 6.2            | 44.8, 4.6              | 49.1, 1.03                 | 33.6, 1.30           | 15.4, 0.58             |

Table S2: Trend test of annual days for drought, heatwave, and CDHW events based on Mann Kendall statistic test for different cumulation periods and pre-identification thresholds. Values larger than 1.96 mean significant positive trends at 0.05 level while values less than -1.96 means significant negative trends.

| Start and end thresholds | Scales of drought | Scales of heatwave | Trend for drought | Trend for heatwave | Union | H D  | D H  | Intersection |
|--------------------------|-------------------|--------------------|-------------------|--------------------|-------|------|------|--------------|
| SPI=-1(or SHI=1)         | 15                | 3                  | 0.22              | 3.67               | 1.47  | 1.46 | 1.52 | 1.53         |
|                          | 30                | 5                  | 1.33              | 3.59               | 1.70  | 1.67 | 1.55 | 1.50         |
|                          | 45                | 7                  | 0.64              | 2.54               | 0.43  | 0.44 | 0.30 | 0.37         |
|                          | 60                | 10                 | -0.03             | 2.57               | 0.60  | 0.53 | 0.64 | 0.54         |
|                          | 90                | 15                 | 0.02              | 2.74               | 0.33  | 0.33 | 0.31 | 0.28         |
| SPI=-1.3(or SHI=1.3)     | 15                | 3                  | 0.42              | 4.10               | 1.68  | 1.70 | 1.74 | 1.78         |
|                          | 30                | 5                  | 0.56              | 3.88               | 0.47  | 0.47 | 0.44 | 0.42         |
|                          | 45                | 7                  | 0.88              | 2.76               | 0.51  | 0.51 | 0.53 | 0.49         |
|                          | 60                | 10                 | 0.30              | 3.31               | 0.74  | 0.76 | 0.62 | 0.66         |
|                          | 90                | 15                 | 0.21              | 2.30               | 0.38  | 0.39 | 0.40 | 0.39         |

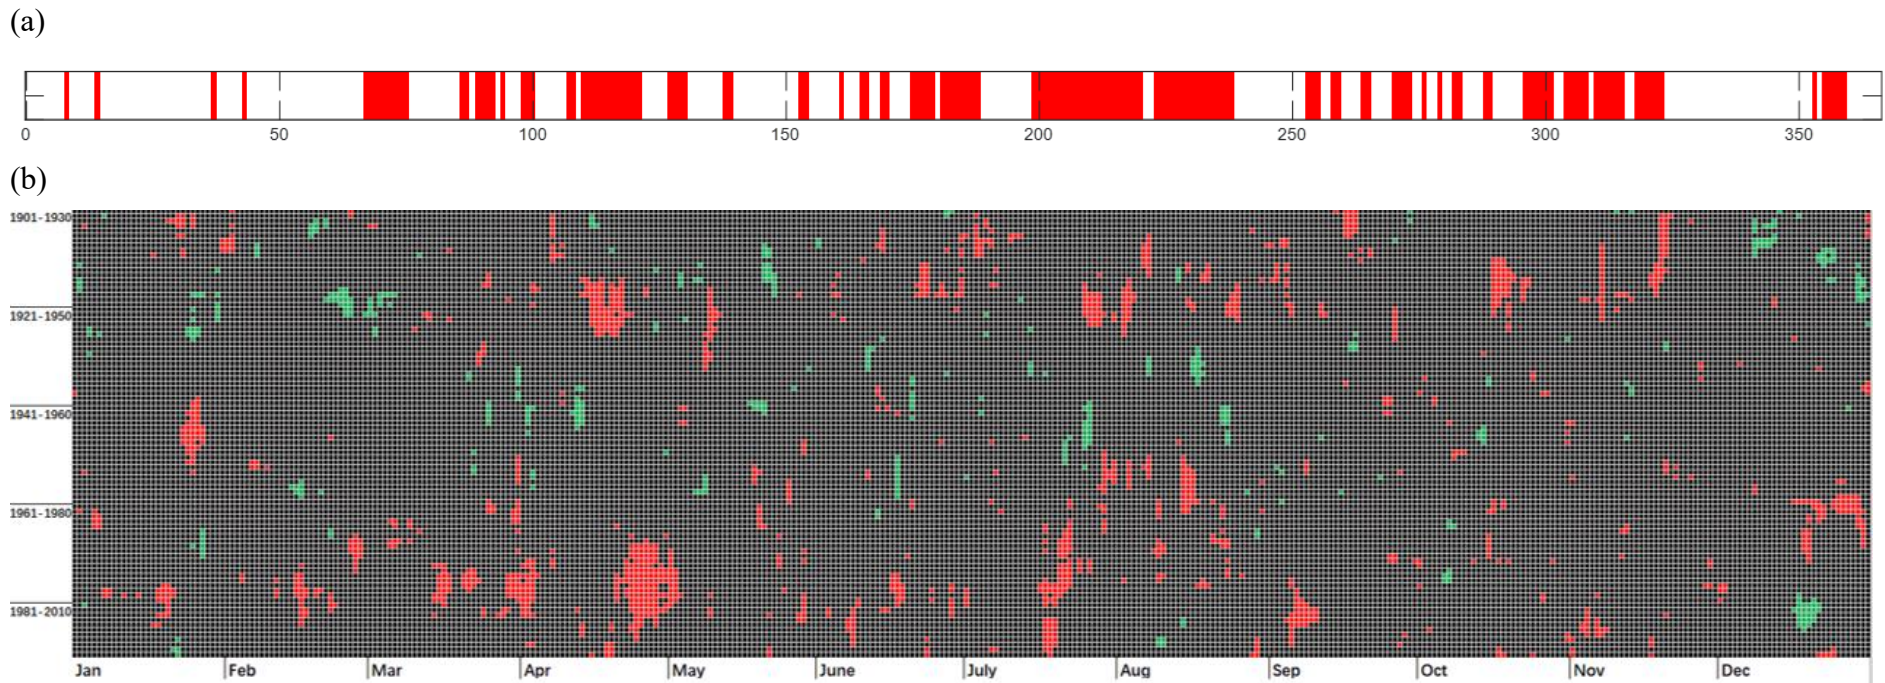

Fig. S1: Mann Kendall statistic test at 0.05 level for daily mean temperature over 1901-1920 (a) and 30-years moving window(b). Red is for significant increasing trends; Green is for significant negative trends; White in (a) and black in (b) mean there is no clear trend. Over the whole time series, test results show 147 days over 365 days have a significant increasing trend and no day has a decreasing trend. For 30-years moving window, on average, only 5.59% periods have a clear trend: 4.38% is increasing and 1.22% is decreasing. Results indicate it is easy and effective to handle nonstationary by regarding the "normal" condition as the past 30-years, instead of the whole period.

(a) Distribution of duration of droughts without removing and merging

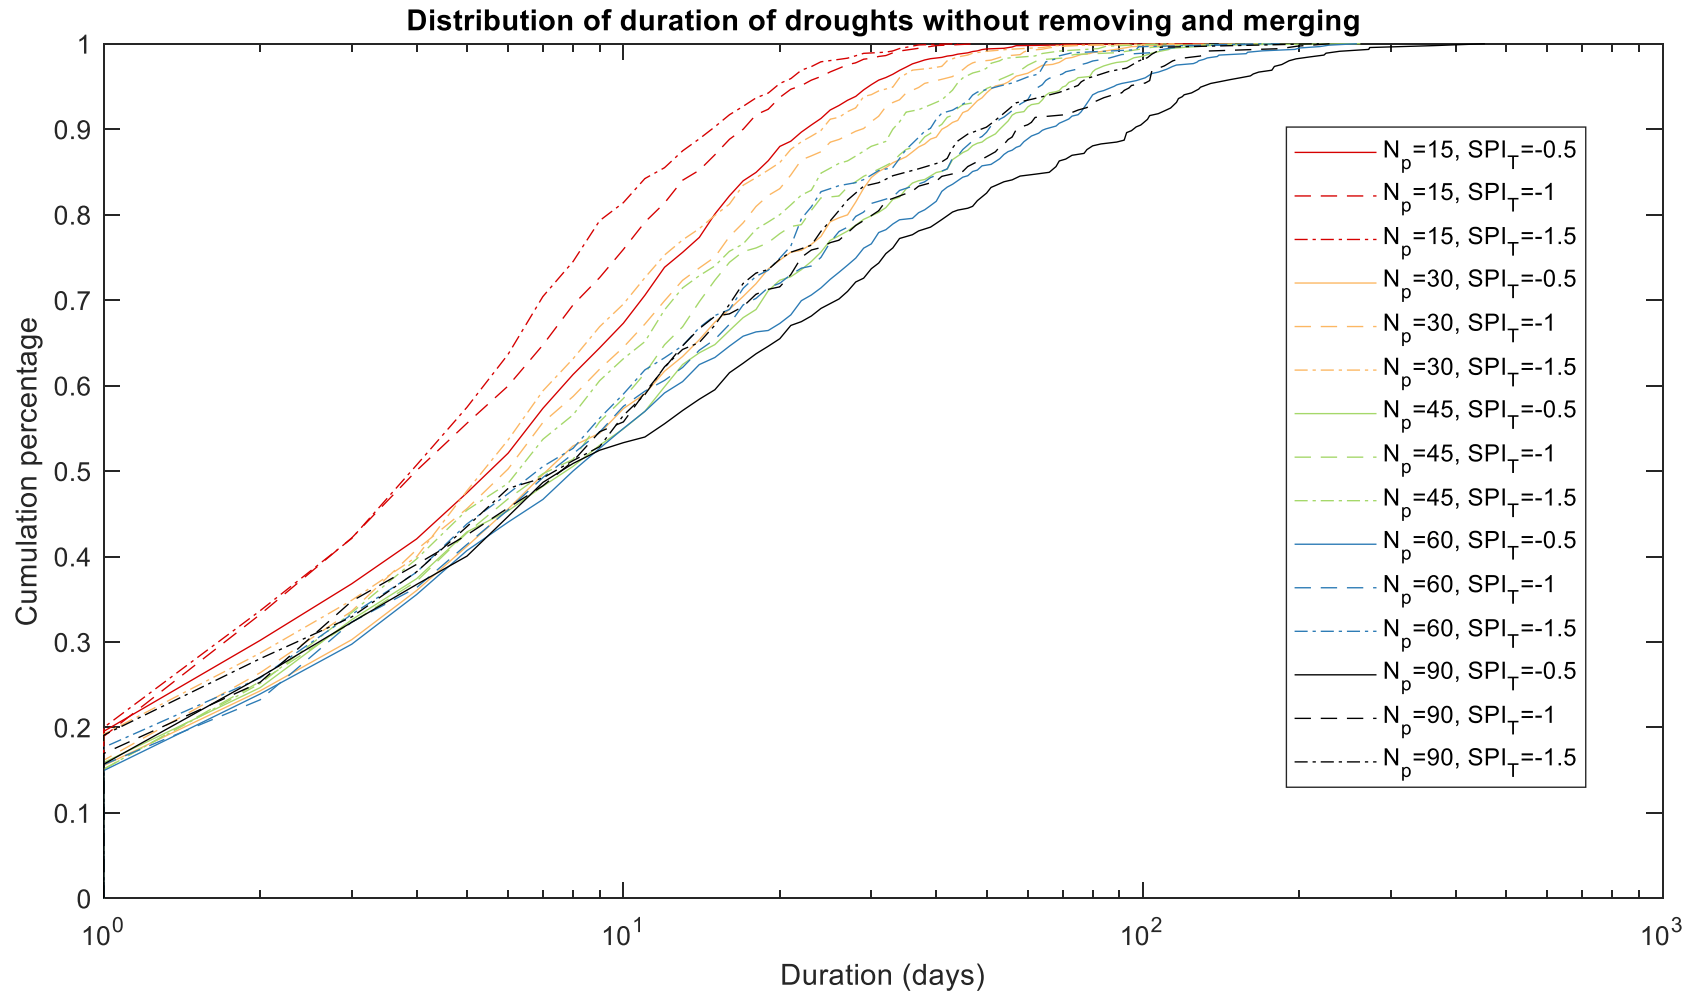

(b) Distribution of duration of heatwaves without removing and merging

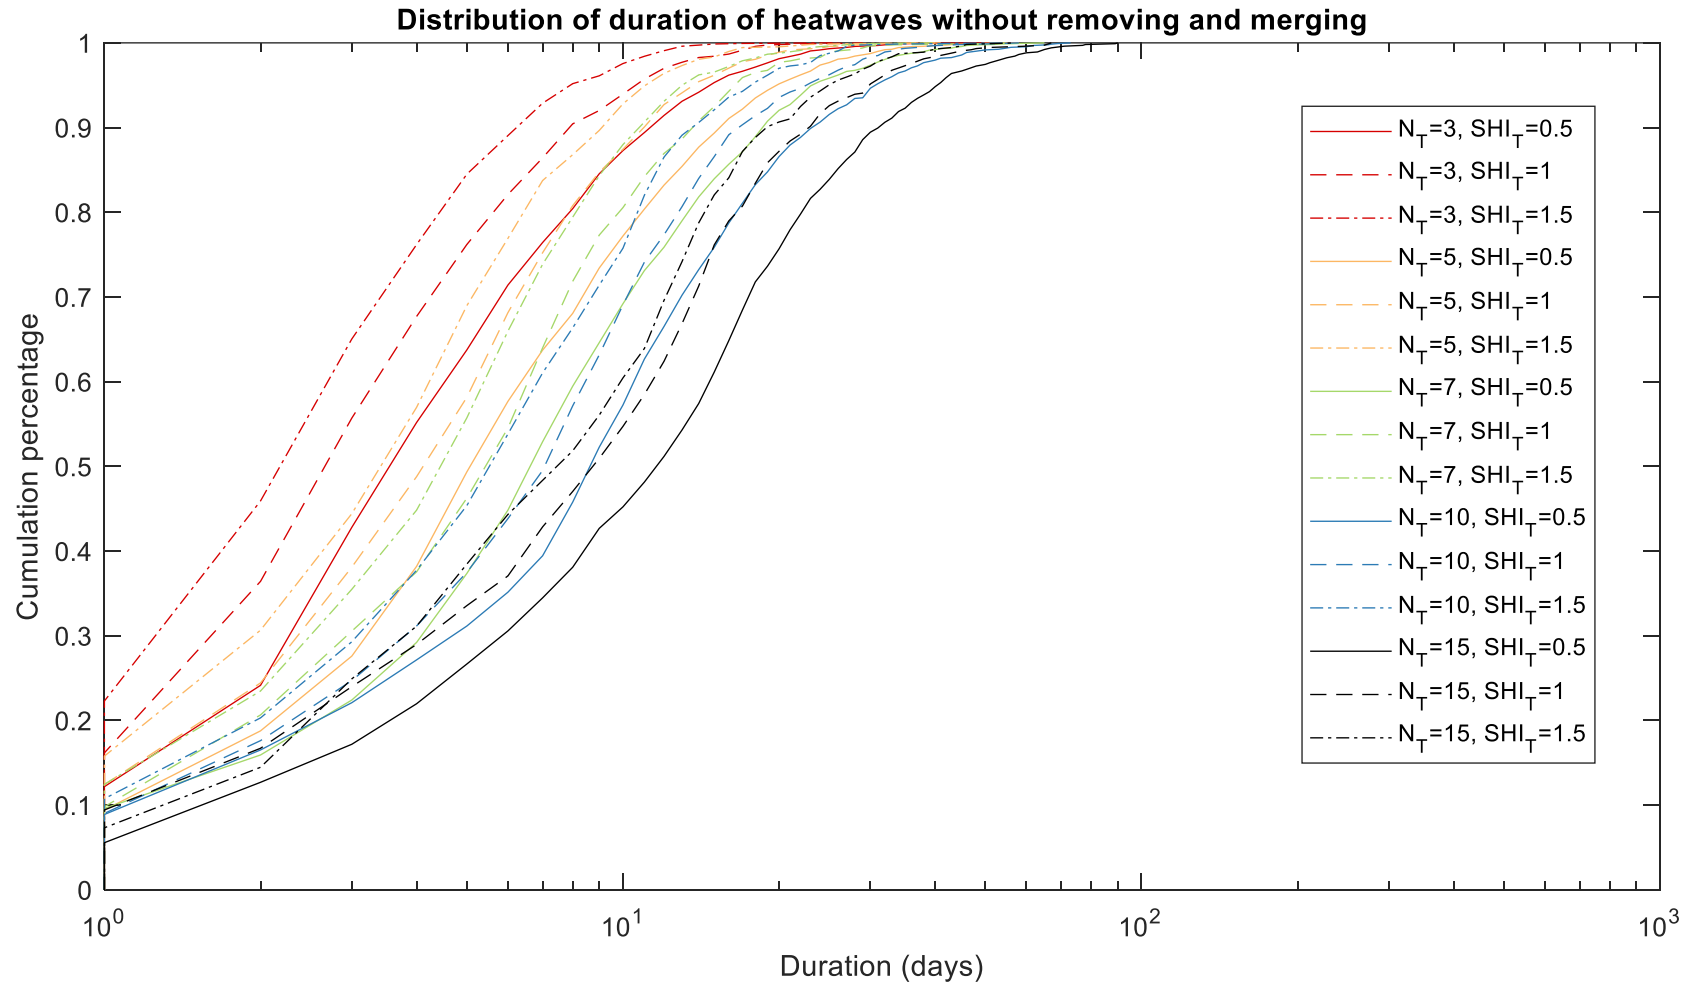

Fig. S2: Distribution of duration of droughts(a) and heatwaves(b) without removing and merging.  $N_P$  and  $N_T$  are cumulation periods of droughts and heatwaves, respectively.  $SPI_T$  and  $SHI_T$  are pre-identification thresholds of droughts and heatwaves, respectively. We can find that the too short durations occupy a large percentile without removing and merging, which could disturb the extreme analysis.

(a) Identification results over the period 1901-1920

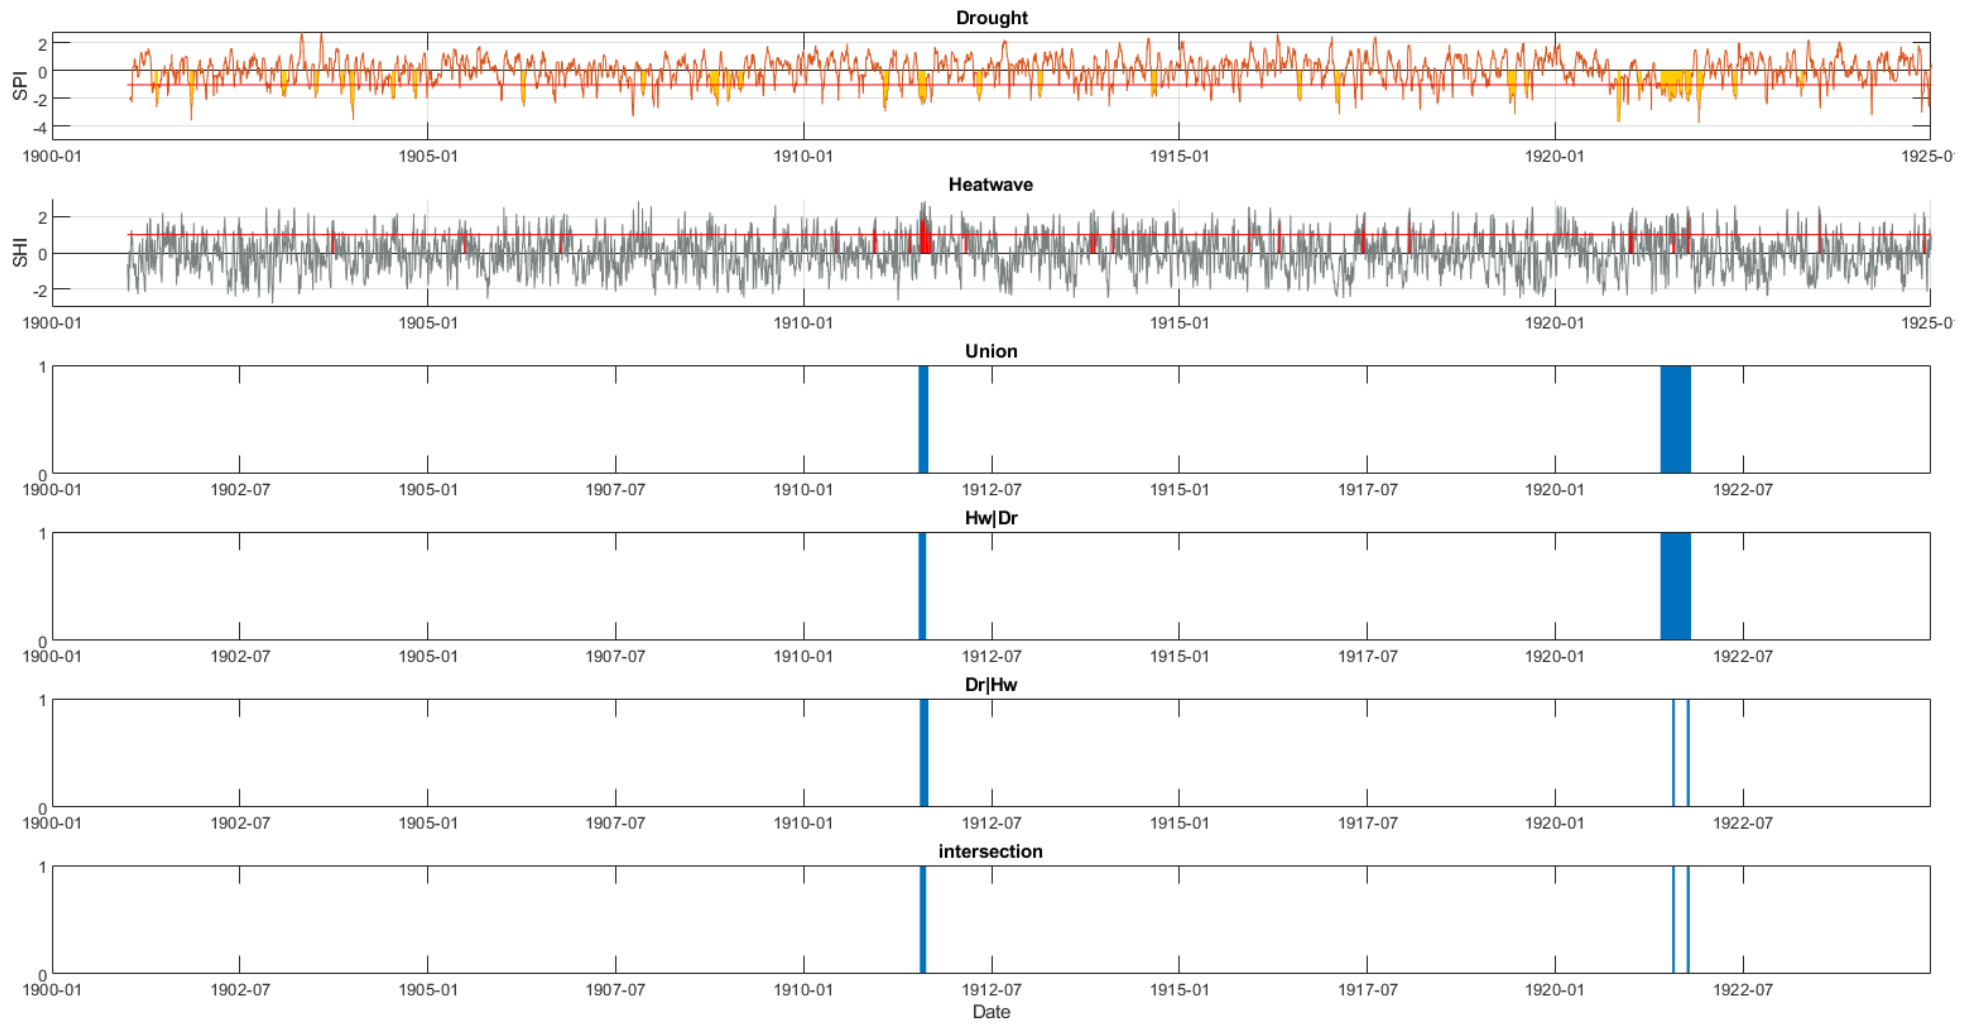

(b) Identification results over the period 1921-1940

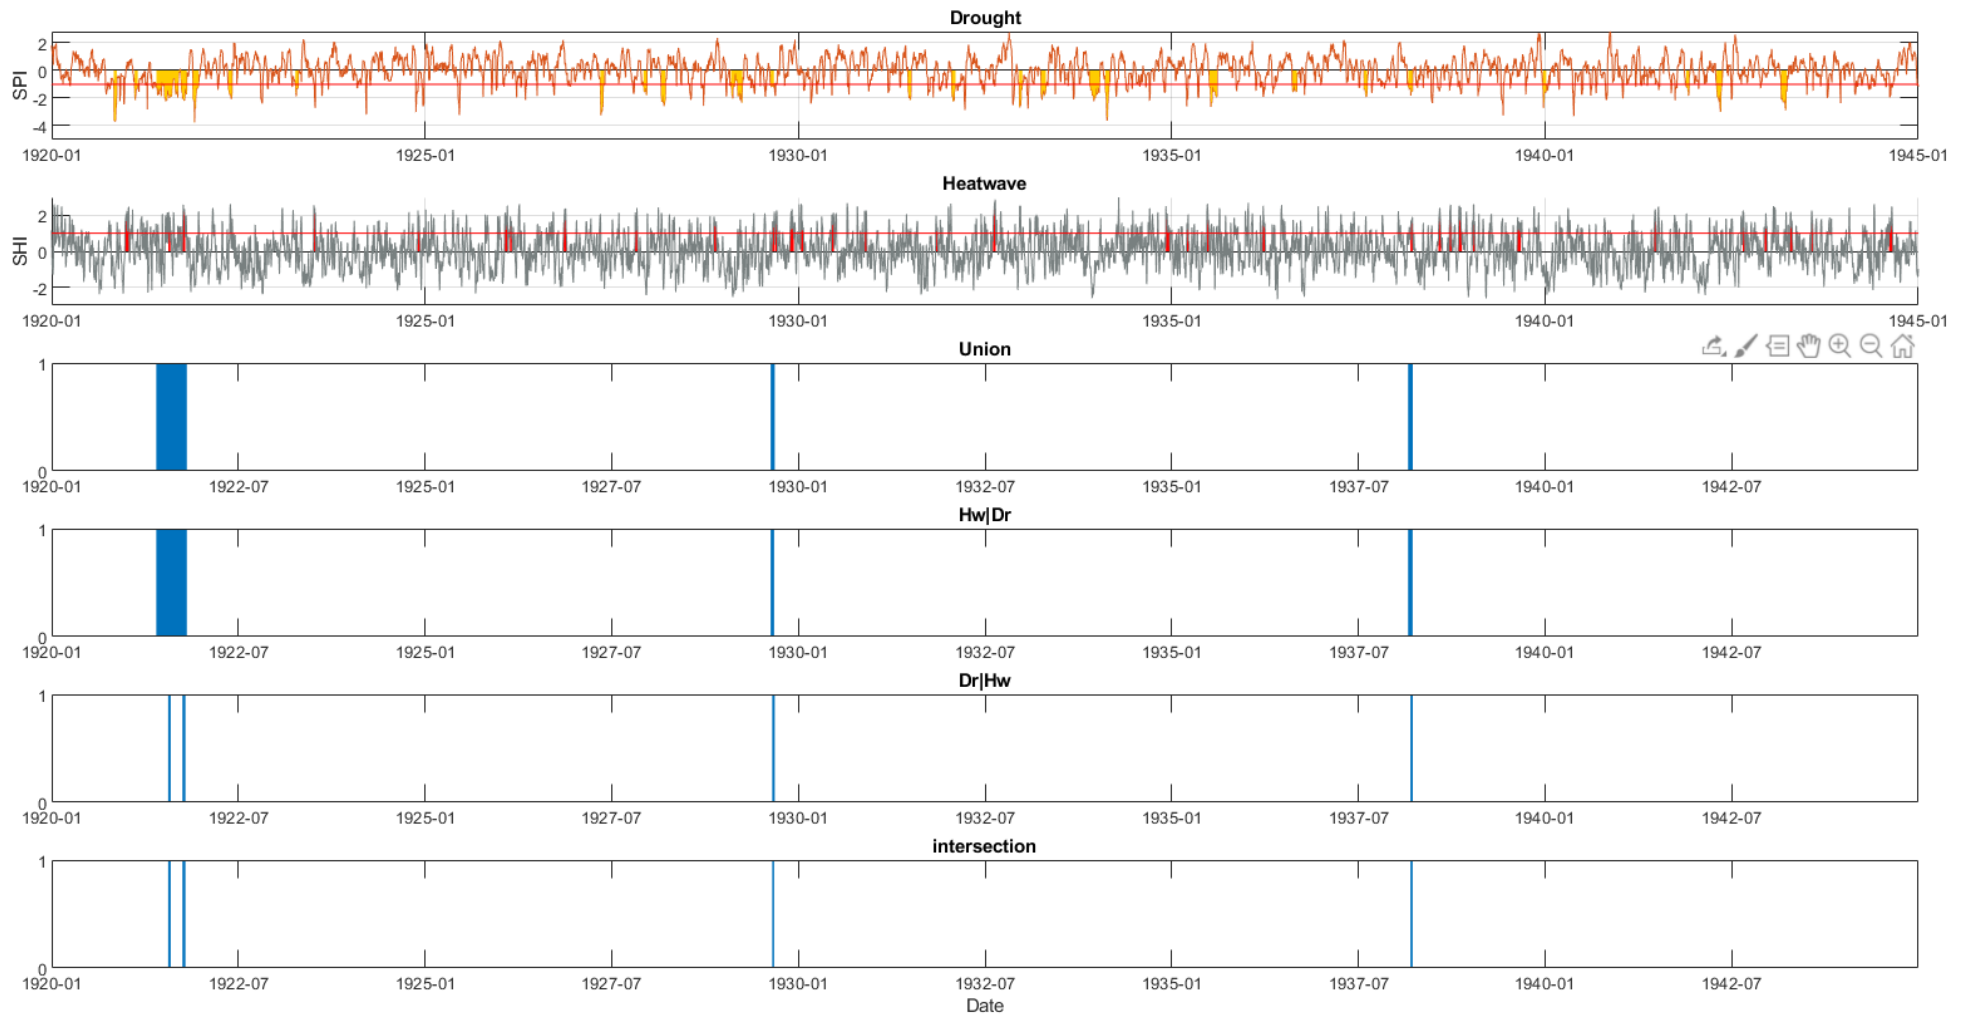



(c) Identification results over the period 1941-1960

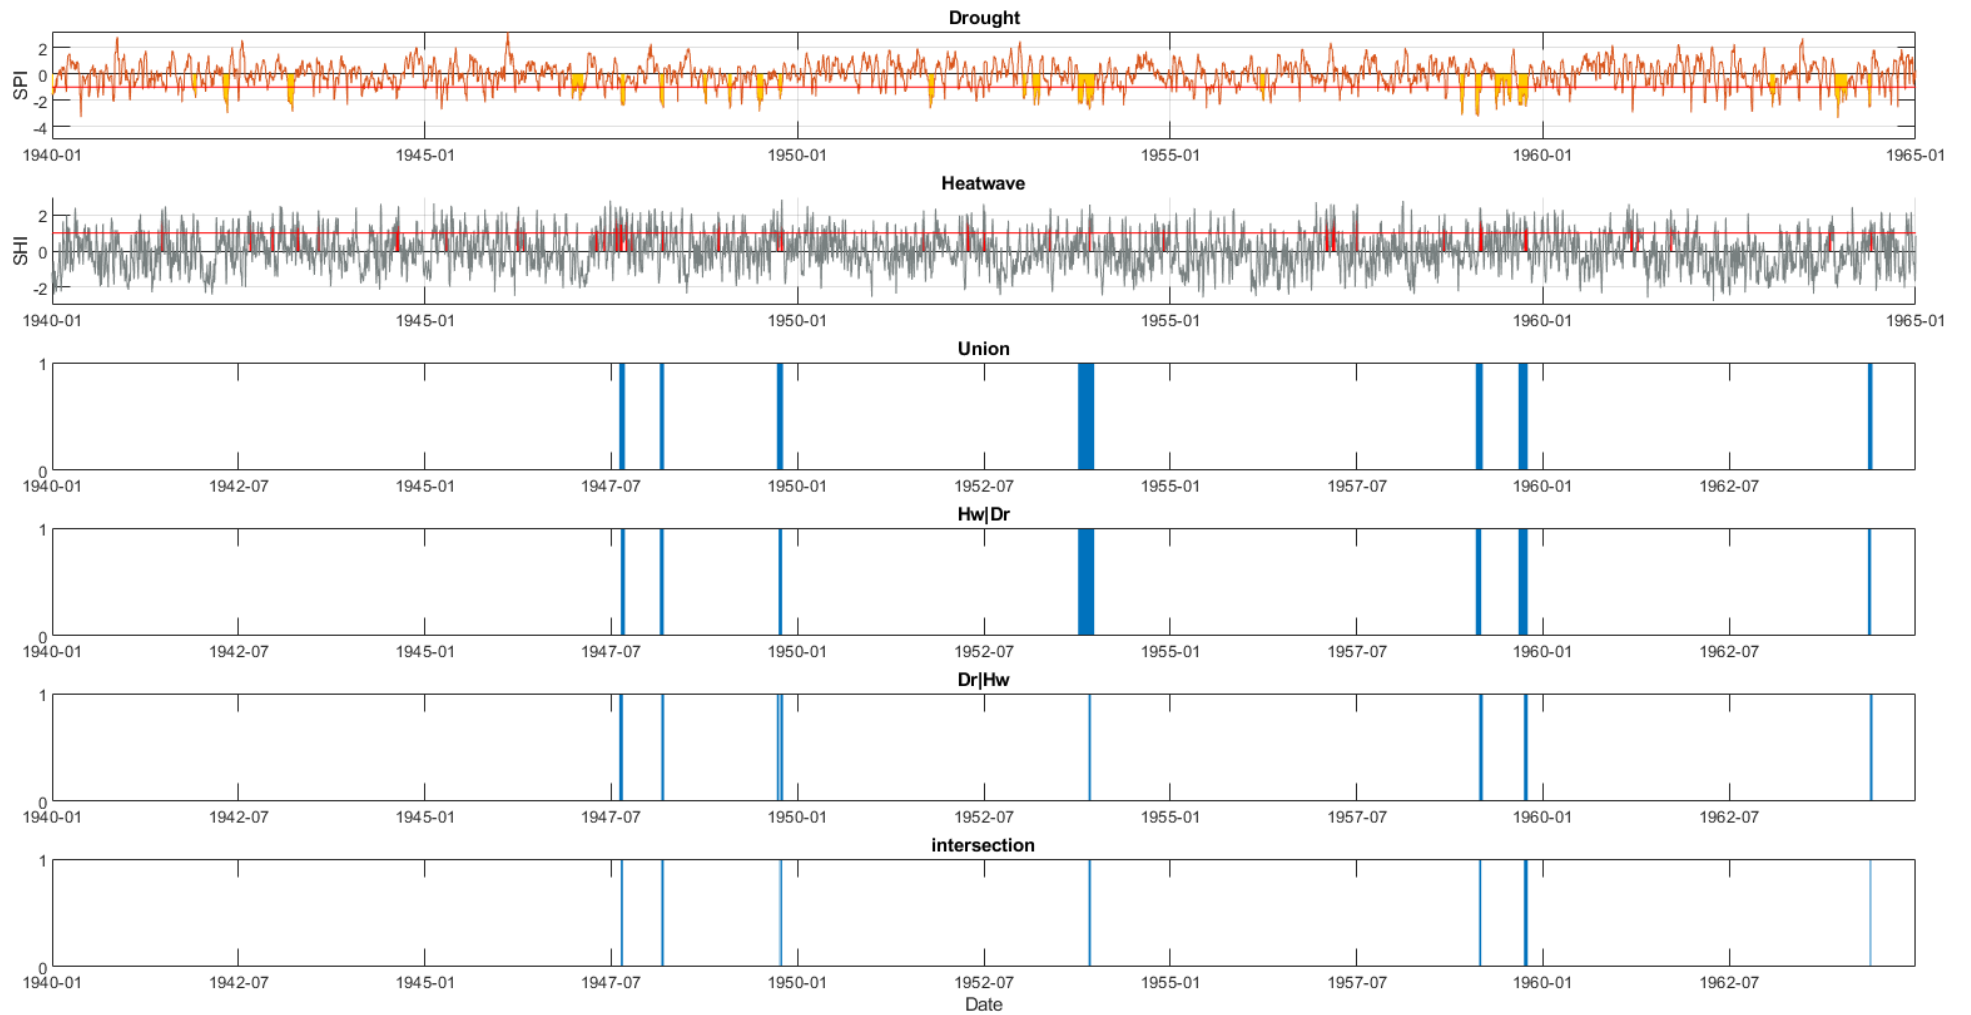

(d) Identification results over the period 1961-1980

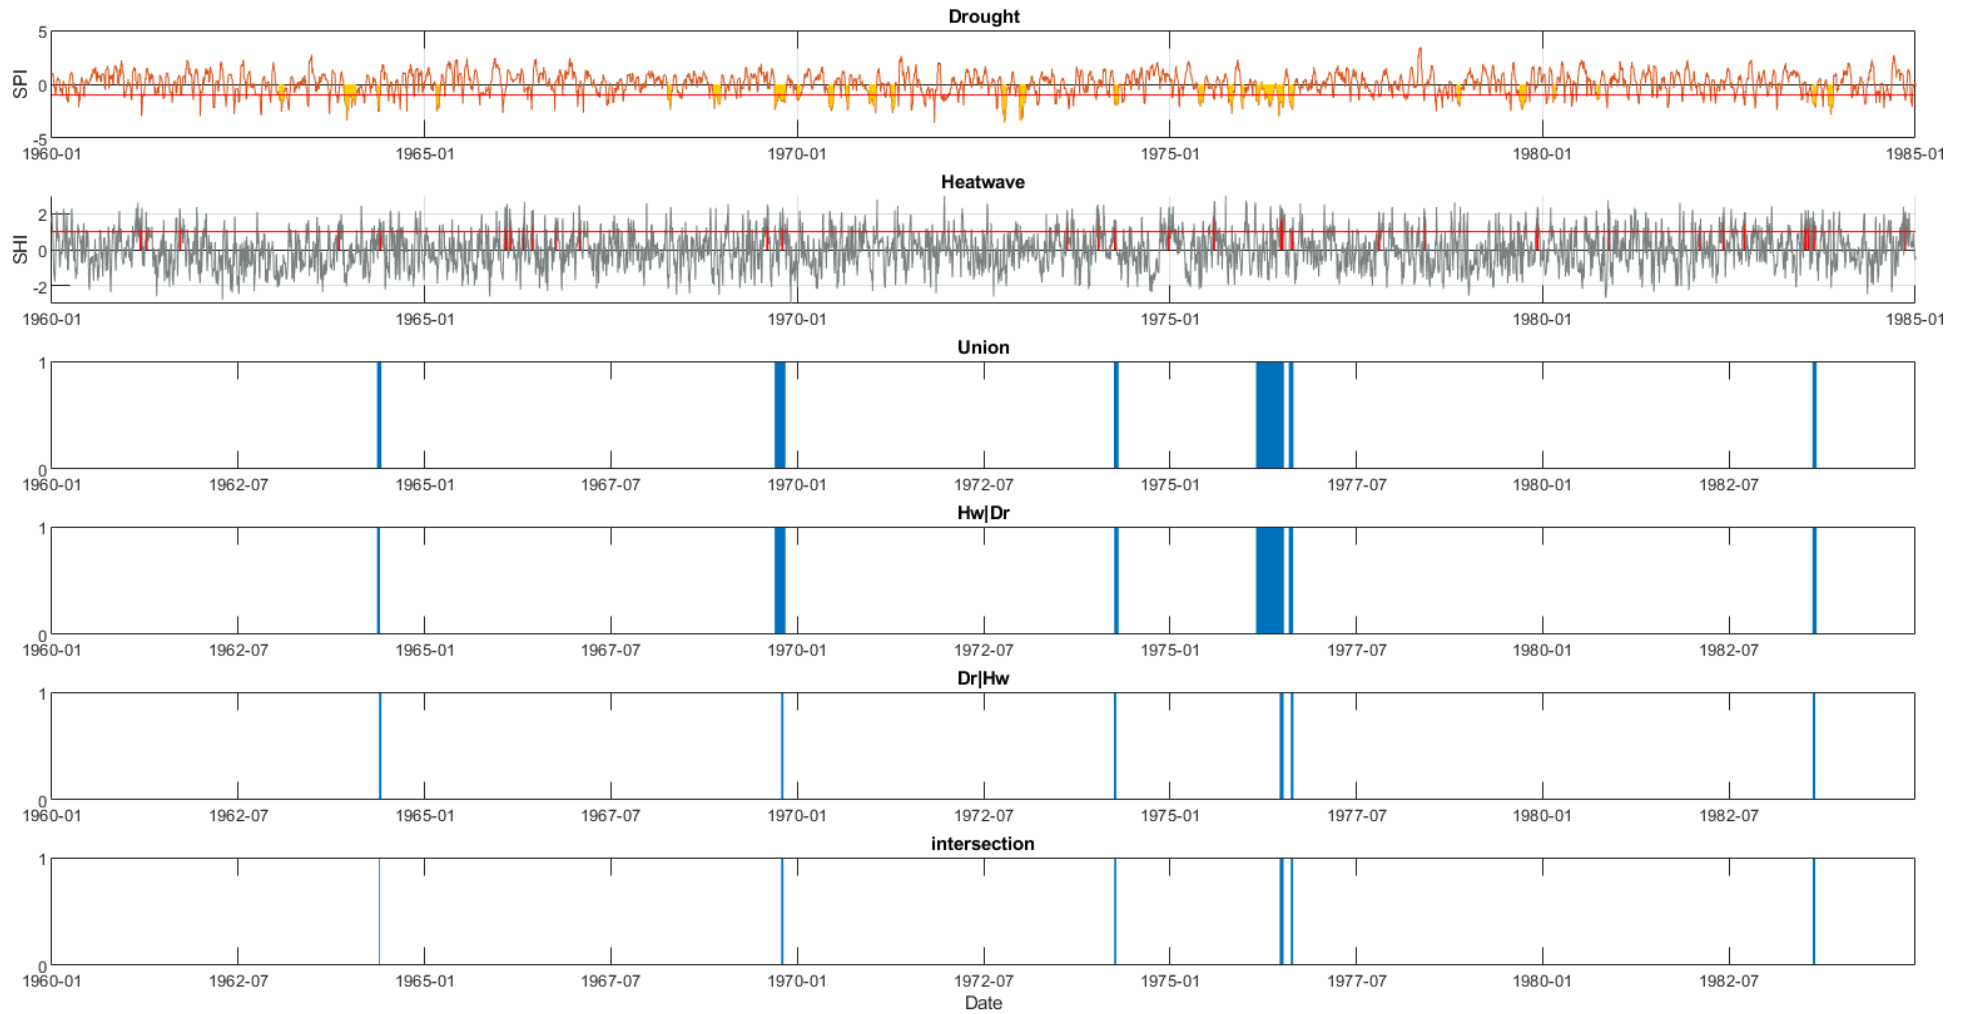

(e) Identification results over the period 1981-2000

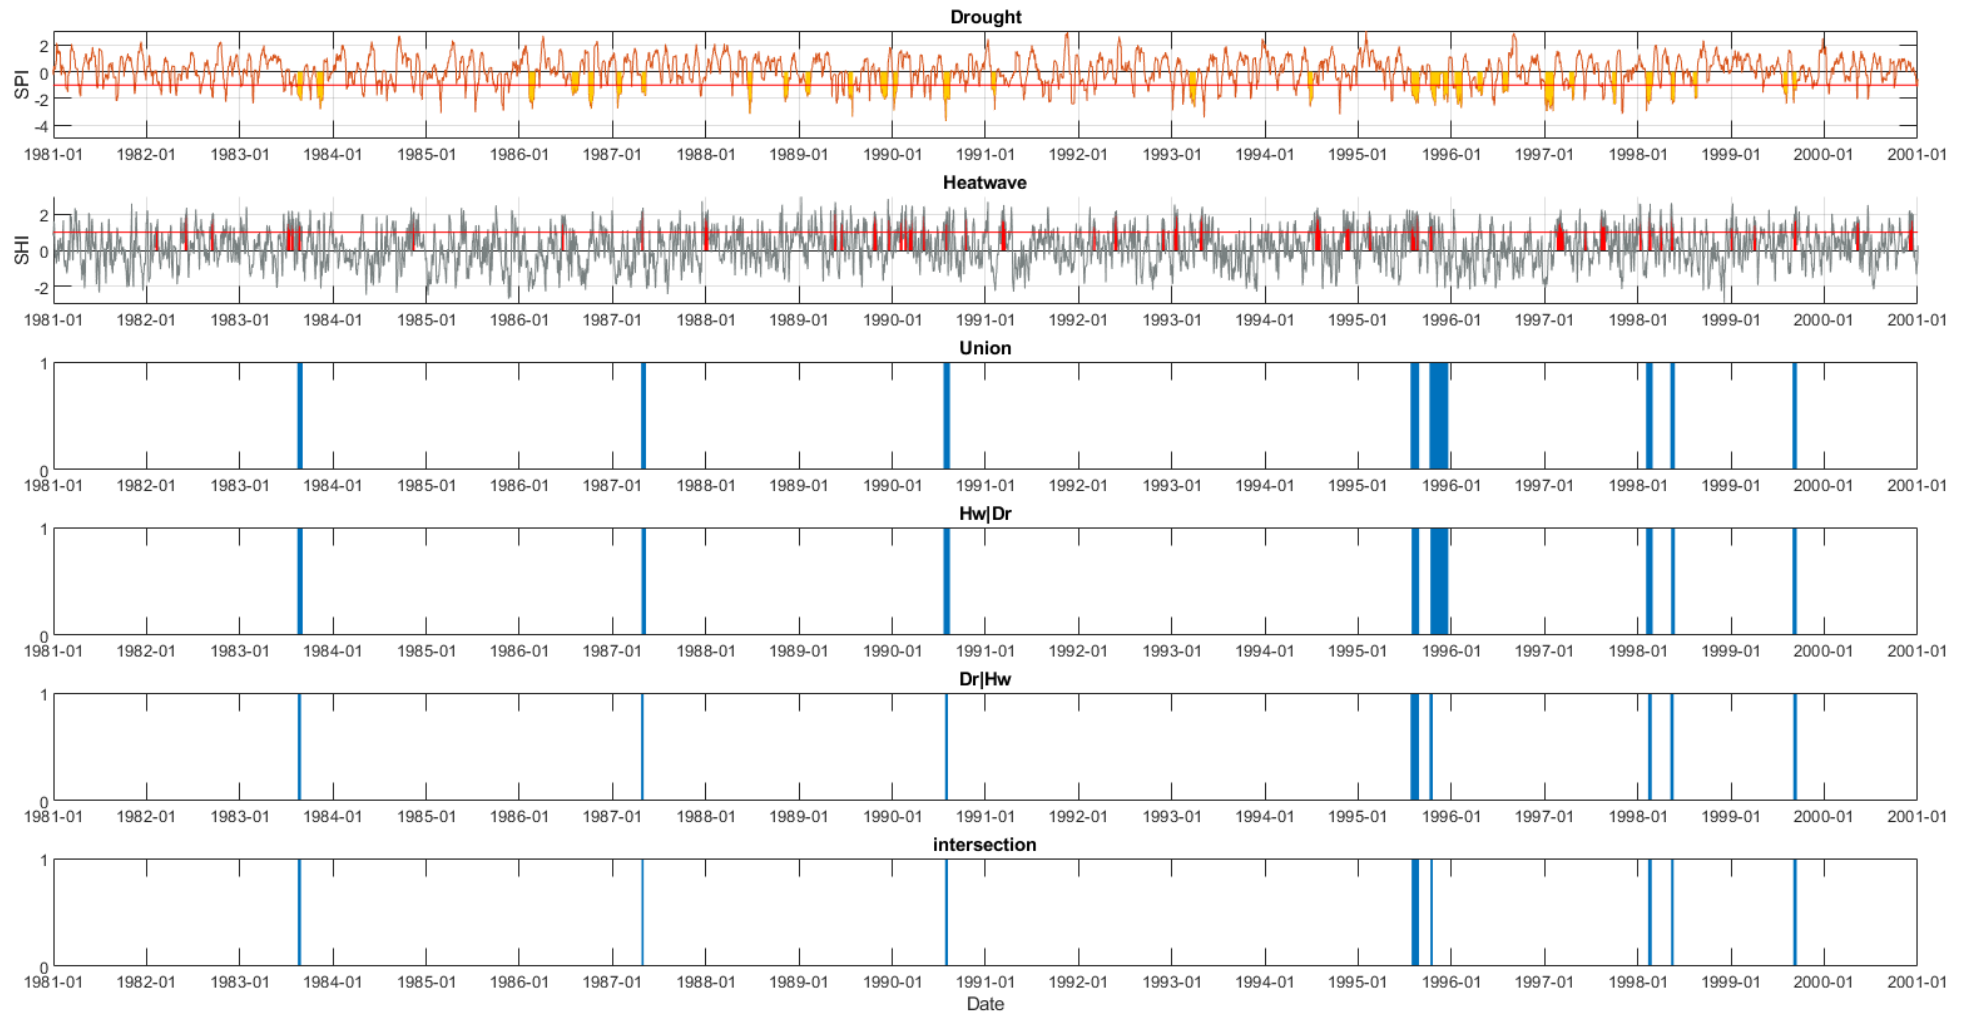

(f) Identification results over the period 2001-2020

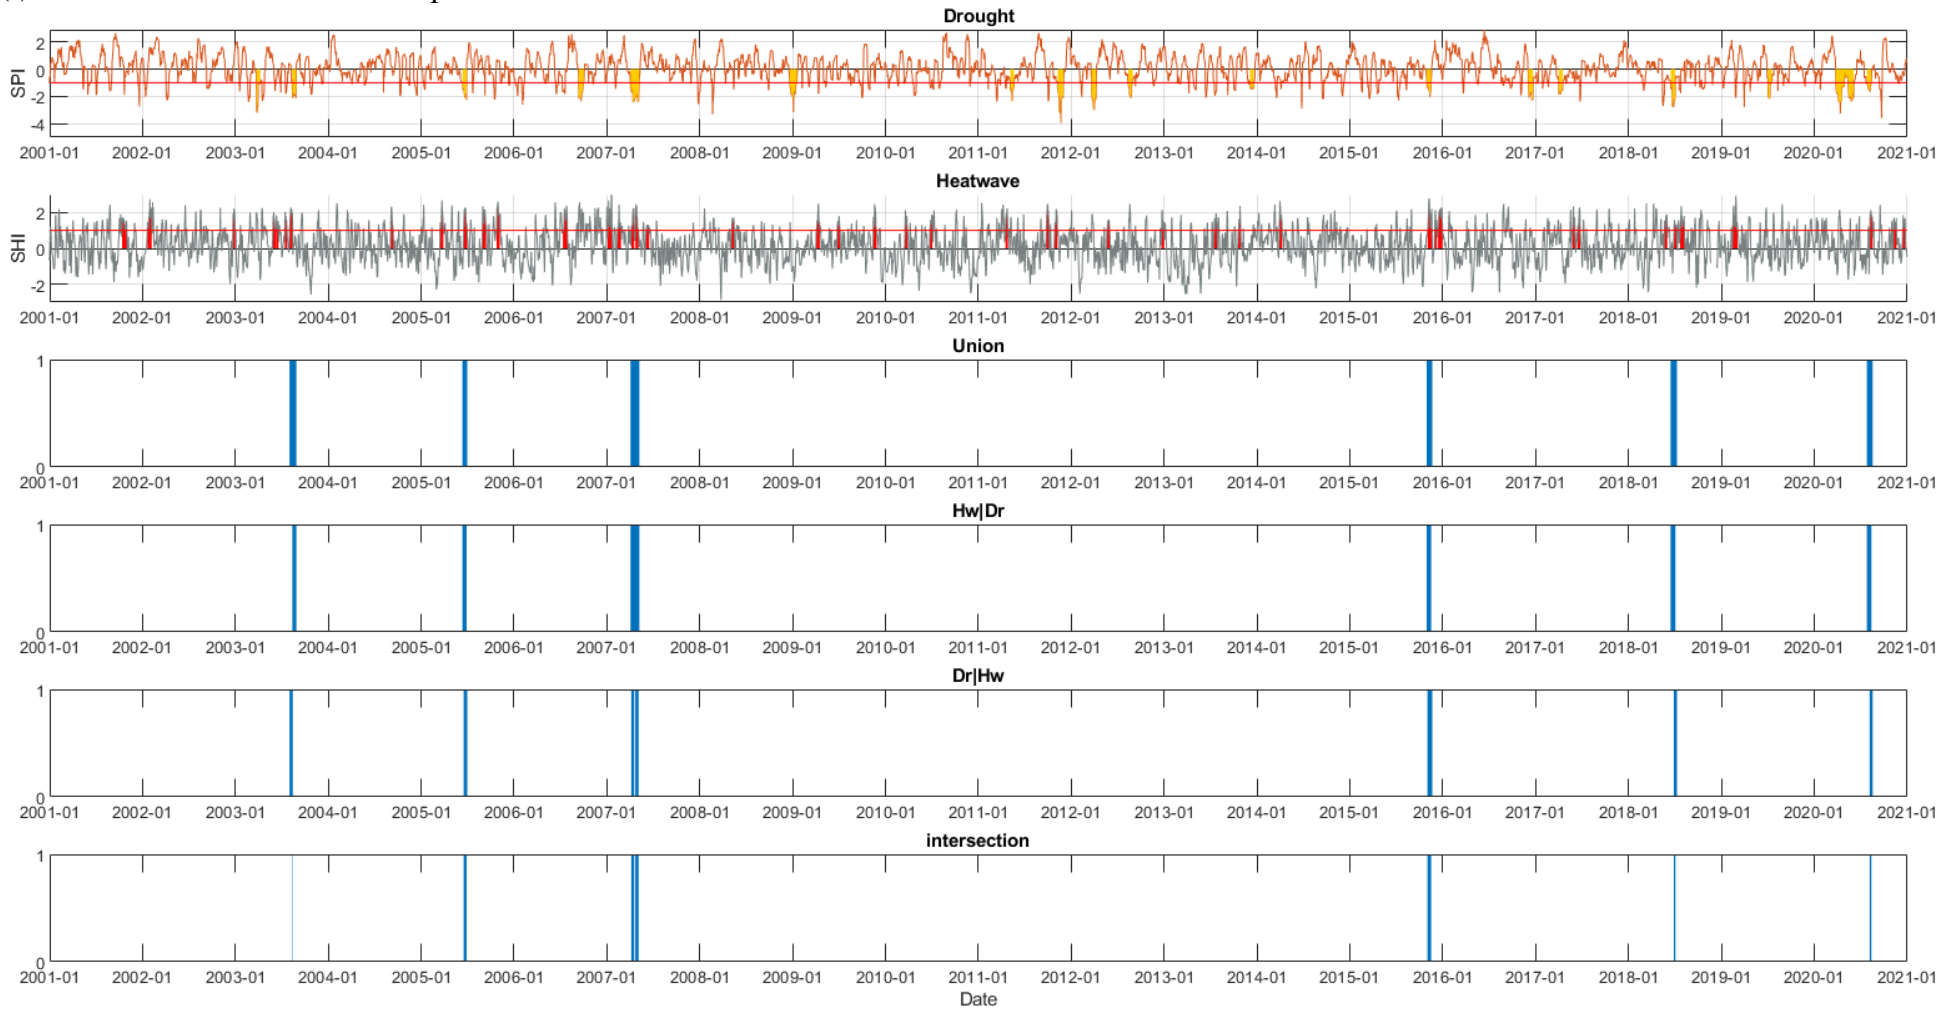

Fig. S3: Identification of drought, heatwave, and CDHW events (union, conditioned on drought, conditioned on heatwave, and intersection). SPI is with 15-days scale and pre identification threshold equals -1; SHI is with 3-days scale and pre identification threshold equals 1.
